# Supplementary material for: Molecular Mechanisms Underlying Metabolic Resistance to Cyflumetofen and Bifenthrin in Tetranychus urticae Koch on Cowpea
Source: MDPI journal article supplement (doi:10.3390/ijms232416220), 2022-12-19
Supplement: s1 [file s1]

**Table S1. Summary of the GO enrichment analysis of the differentially expressed genes in the cyflumetofen-resistant strains**

|                           | GO ontology term                                 | Cluster frequency | Genome frequency of use | Correct P-value |
|---------------------------|--------------------------------------------------|-------------------|-------------------------|-----------------|
|                           |                                                  | out of 26 genes   | out of 4351 genes       |                 |
| <b>Biological process</b> | DNA integration                                  | 5 (19.23%)        | 28 (0.64%)              | 0.000213        |
|                           | 10-formyltetrahydrofolate metabolic process      | 2 (7.69%)         | 2 (0.05%)               | 0.002009        |
|                           | 10-formyltetrahydrofolate catabolic process      | 2 (7.69%)         | 2 (0.05%)               | 0.002009        |
|                           | folic acid-containing compound catabolic process | 2 (7.69%)         | 2 (0.05%)               | 0.002009        |
|                           | pteridine-containing compound catabolic process  | 2 (7.69%)         | 2 (0.05%)               | 0.002009        |
|                           | dicarboxylic acid catabolic process              | 2 (7.69%)         | 2 (0.05%)               | 0.002009        |
|                           | cellular modified amino acid catabolic process   | 2 (7.69%)         | 4 (0.09%)               | 0.008702        |
|                           | DNA metabolic process                            | 6 (23.08%)        | 186 (4.27%)             | 0.019343        |
|                           | folic acid-containing compound metabolic process | 2 (7.69%)         | 8 (0.18%)               | 0.023168        |
|                           | tetrahydrofolate metabolic process               | 2 (7.69%)         | 8 (0.18%)               | 0.023168        |
|                           | autophagy                                        | 3 (11.54%)        | 37 (0.85%)              | 0.028674        |
|                           | process utilizing autophagic mechanism           | 3 (11.54%)        | 37 (0.85%)              | 0.028674        |
|                           | one-carbon metabolic process                     | 2 (7.69%)         | 11 (0.25%)              | 0.035657        |
|                           | pteridine-containing compound metabolic process  | 2 (7.69%)         | 12 (0.28%)              | 0.036516        |
|                           | dicarboxylic acid metabolic process              | 2 (7.69%)         | 13 (0.30%)              | 0.041514        |
|                           |                                                  | out of 38 genes   | out of 5997 genes       |                 |
| <b>Cellular component</b> | nucleosome                                       | 3 (7.89%)         | 24 (0.40%)              | 0.016905        |
|                           | DNA packaging complex                            | 3 (7.89%)         | 26 (0.43%)              | 0.019343        |
|                           | protein-DNA complex                              | 3 (7.89%)         | 31 (0.52%)              | 0.023168        |
|                           |                                                  | out of 65 genes   | out of 7398 genes       |                 |
| <b>Molecular function</b> | aspartic-type endopeptidase activity             | 5 (7.69%)         | 37 (0.50%)              | 0.002009        |
|                           | aspartic-type peptidase activity                 | 5 (7.69%)         | 37 (0.50%)              | 0.002009        |
|                           | pigment binding                                  | 5 (7.69%)         | 45 (0.61%)              | 0.00217         |

|                                                                   |             |             |          |
|-------------------------------------------------------------------|-------------|-------------|----------|
| formyltetrahydrofolate dehydrogenase<br>activity                  | 2 (3.08%)   | 2 (0.03%)   | 0.003558 |
| endopeptidase activity                                            | 10 (15.38%) | 333 (4.50%) | 0.019343 |
| peptidase activity                                                | 13 (20.00%) | 537 (7.26%) | 0.019343 |
| small conductance calcium-activated<br>potassium channel activity | 2 (3.08%)   | 7 (0.09%)   | 0.033008 |
| calcium activated cation channel<br>activity                      | 2 (3.08%)   | 8 (0.11%)   | 0.035657 |
| calcium-activated potassium channel<br>activity                   | 2 (3.08%)   | 8 (0.11%)   | 0.035657 |
| hydroxymethyl-, formyl- and related<br>transferase activity       | 2 (3.08%)   | 8 (0.11%)   | 0.035657 |
| ion gated channel activity                                        | 2 (3.08%)   | 8 (0.11%)   | 0.035657 |
| peptidase activity, acting on L-amino<br>acid peptides            | 11 (16.92%) | 484 (6.54%) | 0.046555 |
| cysteine-type endopeptidase inhibitor<br>activity                 | 3 (4.62%)   | 34 (0.46%)  | 0.048154 |

**Table S2. Summary of the GO enrichment analysis of the differentially expressed genes in the bifenthrin-resistant strains**

| GO ontology term          |                                                  | Cluster frequency | Genome frequency of use | Correct P-value |
|---------------------------|--------------------------------------------------|-------------------|-------------------------|-----------------|
|                           |                                                  | out of 105 genes  | out of 4351 genes       |                 |
| <b>Biological process</b> | sphingolipid metabolic process                   | 11 (10.48%)       | 73 (1.68%)              | 0.00049         |
|                           | membrane lipid metabolic process                 | 12 (11.43%)       | 99 (2.28%)              | 0.001115        |
|                           | dicarboxylic acid metabolic process              | 5 (4.76%)         | 13 (0.30%)              | 0.002063        |
|                           | cellular lipid metabolic process                 | 17 (16.19%)       | 267 (6.14%)             | 0.022646        |
|                           | ganglioside metabolic process                    | 4 (3.81%)         | 16 (0.37%)              | 0.025211        |
|                           | lipid metabolic process                          | 21 (20.00%)       | 398 (9.15%)             | 0.025211        |
|                           | glycosphingolipid metabolic process              | 4 (3.81%)         | 16 (0.37%)              | 0.025211        |
|                           | ganglioside catabolic process                    | 4 (3.81%)         | 16 (0.37%)              | 0.025211        |
|                           | 10-formyltetrahydrofolate metabolic process      | 2 (1.90%)         | 2 (0.05%)               | 0.025211        |
|                           | 10-formyltetrahydrofolate catabolic process      | 2 (1.90%)         | 2 (0.05%)               | 0.025211        |
|                           | folic acid-containing compound catabolic process | 2 (1.90%)         | 2 (0.05%)               | 0.025211        |
|                           | glycolipid catabolic process                     | 4 (3.81%)         | 16 (0.37%)              | 0.025211        |
|                           | pteridine-containing compound catabolic process  | 2 (1.90%)         | 2 (0.05%)               | 0.025211        |
|                           | dicarboxylic acid catabolic process              | 2 (1.90%)         | 2 (0.05%)               | 0.025211        |
|                           | glycosphingolipid catabolic process              | 4 (3.81%)         | 16 (0.37%)              | 0.025211        |
|                           | regulation of catalytic activity                 | 9 (8.57%)         | 91 (2.09%)              | 0.025211        |
|                           | folic acid-containing compound metabolic process | 3 (2.86%)         | 8 (0.18%)               | 0.026068        |
|                           | tetrahydrofolate metabolic process               | 3 (2.86%)         | 8 (0.18%)               | 0.026068        |
|                           | regulation of molecular function                 | 9 (8.57%)         | 102 (2.34%)             | 0.026068        |
|                           | ceramide catabolic process                       | 4 (3.81%)         | 18 (0.41%)              | 0.027103        |
|                           | ceramide metabolic process                       | 4 (3.81%)         | 21 (0.48%)              | 0.042539        |
| <b>Cellular component</b> |                                                  | out of 138 genes  | out of 5997 genes       |                 |
|                           | integral component of membrane                   | 100 (72.46%)      | 3577 (59.65%)           | 0.035415        |
|                           | intrinsic component of membrane                  | 100 (72.46%)      | 3579 (59.68%)           | 0.035415        |
| <b>Molecular</b>          |                                                  | out of 245 genes  | out of 7398 genes       |                 |

|                 |                                                     |              |               |          |
|-----------------|-----------------------------------------------------|--------------|---------------|----------|
| <b>function</b> | pigment binding                                     | 11 (4.49%)   | 45 (0.61%)    | 0.000158 |
|                 | catalytic activity                                  | 165 (67.35%) | 4153 (56.14%) | 0.022646 |
|                 | peptidase activity                                  | 34 (13.88%)  | 537 (7.26%)   | 0.022646 |
|                 | hydrolase activity                                  | 84 (34.29%)  | 1779 (24.05%) | 0.022646 |
|                 | cysteine-type endopeptidase activity                | 8 (3.27%)    | 51 (0.69%)    | 0.025211 |
|                 | glucosylceramidase activity                         | 7 (2.86%)    | 41 (0.55%)    | 0.025211 |
|                 | cysteine-type peptidase activity                    | 14 (5.71%)   | 143 (1.93%)   | 0.025211 |
|                 | endopeptidase activity                              | 23 (9.39%)   | 333 (4.50%)   | 0.026068 |
|                 | formyltetrahydrofolate dehydrogenase activity       | 2 (0.82%)    | 2 (0.03%)     | 0.035415 |
|                 | peptidase activity, acting on L-amino acid peptides | 29 (11.84%)  | 484 (6.54%)   | 0.040118 |

**Table S3.** Summary of the GO enrichment analysis of the common differentially expressed genes between the Lab\_SS-vs-R\_cfm group and the Lab\_SS-vs-R\_bft group

| GO ontology term      |                                                               | Cluster frequency | Genome frequency<br>of use | Correct<br>P-value |
|-----------------------|---------------------------------------------------------------|-------------------|----------------------------|--------------------|
|                       |                                                               | out of 13 genes   | out of 4351 genes          |                    |
| Biological<br>process | 10-formyltetrahydrofolate metabolic process                   | 2 (15.38%)        | 2 (0.05%)                  | 0.000419           |
|                       | 10-formyltetrahydrofolate catabolic process                   | 2 (15.38%)        | 2 (0.05%)                  | 0.000419           |
|                       | folic acid-containing compound catabolic process              | 2 (15.38%)        | 2 (0.05%)                  | 0.000419           |
|                       | pteridine-containing compound catabolic process               | 2 (15.38%)        | 2 (0.05%)                  | 0.000419           |
|                       | dicarboxylic acid catabolic process                           | 2 (15.38%)        | 2 (0.05%)                  | 0.000419           |
|                       | cellular modified amino acid catabolic process                | 2 (15.38%)        | 4 (0.09%)                  | 0.001879           |
|                       | folic acid-containing compound metabolic process              | 2 (15.38%)        | 8 (0.18%)                  | 0.006968           |
|                       | tetrahydrofolate metabolic process                            | 2 (15.38%)        | 8 (0.18%)                  | 0.006968           |
|                       | one-carbon metabolic process                                  | 2 (15.38%)        | 11 (0.25%)                 | 0.012380           |
|                       | pteridine-containing compound metabolic process               | 2 (15.38%)        | 12 (0.28%)                 | 0.013595           |
|                       | dicarboxylic acid metabolic process                           | 2 (15.38%)        | 13 (0.30%)                 | 0.014806           |
|                       | nucleosome assembly                                           | 2 (15.38%)        | 16 (0.37%)                 | 0.019642           |
|                       | chromatin assembly                                            | 2 (15.38%)        | 17 (0.39%)                 | 0.020834           |
|                       | immune system process                                         | 2 (15.38%)        | 20 (0.46%)                 | 0.024387           |
|                       | DNA packaging                                                 | 2 (15.38%)        | 20 (0.46%)                 | 0.024387           |
|                       | chromatin assembly or disassembly                             | 2 (15.38%)        | 20 (0.46%)                 | 0.024387           |
|                       | cellular modified amino acid metabolic process                | 2 (15.38%)        | 22 (0.51%)                 | 0.026735           |
|                       | nucleosome organization                                       | 2 (15.38%)        | 22 (0.51%)                 | 0.026735           |
|                       | protein-DNA complex assembly                                  | 2 (15.38%)        | 28 (0.64%)                 | 0.036379           |
|                       | regulation of immune effector process                         | 1 (7.69%)         | 2 (0.05%)                  | 0.036401           |
|                       | inflammatory response                                         | 1 (7.69%)         | 2 (0.05%)                  | 0.036401           |
|                       | post-embryonic hemopoiesis                                    | 1 (7.69%)         | 2 (0.05%)                  | 0.036401           |
|                       | larval lymph gland hemopoiesis                                | 1 (7.69%)         | 2 (0.05%)                  | 0.036401           |
|                       | regulation of CD4-positive, alpha-beta T cell differentiation | 1 (7.69%)         | 2 (0.05%)                  | 0.036401           |

|                                                                           |            |            |          |
|---------------------------------------------------------------------------|------------|------------|----------|
| negative regulation of CD4-positive,<br>alpha-beta T cell differentiation | 1 (7.69%)  | 2 (0.05%)  | 0.036401 |
| regulation of T cell differentiation                                      | 1 (7.69%)  | 2 (0.05%)  | 0.036401 |
| negative regulation of T cell<br>differentiation                          | 1 (7.69%)  | 2 (0.05%)  | 0.036401 |
| regulation of lymphocyte<br>differentiation                               | 1 (7.69%)  | 2 (0.05%)  | 0.036401 |
| negative regulation of lymphocyte<br>differentiation                      | 1 (7.69%)  | 2 (0.05%)  | 0.036401 |
| regulation of alpha-beta T cell<br>activation                             | 1 (7.69%)  | 2 (0.05%)  | 0.036401 |
| negative regulation of alpha-beta T<br>cell activation                    | 1 (7.69%)  | 2 (0.05%)  | 0.036401 |
| regulation of alpha-beta T cell<br>differentiation                        | 1 (7.69%)  | 2 (0.05%)  | 0.036401 |
| negative regulation of alpha-beta T<br>cell differentiation               | 1 (7.69%)  | 2 (0.05%)  | 0.036401 |
| lymph gland development                                                   | 1 (7.69%)  | 2 (0.05%)  | 0.036401 |
| negative regulation of immune<br>response                                 | 1 (7.69%)  | 2 (0.05%)  | 0.036401 |
| DNA conformation change                                                   | 2 (15.38%) | 29 (0.67%) | 0.036401 |
| protein-DNA complex subunit<br>organization                               | 2 (15.38%) | 34 (0.78%) | 0.036401 |
| regulation of leukocyte<br>differentiation                                | 1 (7.69%)  | 2 (0.05%)  | 0.036401 |
| negative regulation of leukocyte<br>differentiation                       | 1 (7.69%)  | 2 (0.05%)  | 0.036401 |
| negative regulation of hemopoiesis                                        | 1 (7.69%)  | 2 (0.05%)  | 0.036401 |
| regulation of CD4-positive, alpha-<br>beta T cell activation              | 1 (7.69%)  | 2 (0.05%)  | 0.036401 |
| negative regulation of CD4-positive,<br>alpha-beta T cell activation      | 1 (7.69%)  | 2 (0.05%)  | 0.036401 |
| negative regulation of immune<br>system process                           | 1 (7.69%)  | 3 (0.07%)  | 0.041308 |
| regulation of leukocyte activation                                        | 1 (7.69%)  | 3 (0.07%)  | 0.041308 |
| negative regulation of leukocyte<br>activation                            | 1 (7.69%)  | 3 (0.07%)  | 0.041308 |
| organic acid catabolic process                                            | 2 (15.38%) | 46 (1.06%) | 0.041308 |
| regulation of cell-cell adhesion                                          | 1 (7.69%)  | 3 (0.07%)  | 0.041308 |
| negative regulation of cell-cell<br>adhesion                              | 1 (7.69%)  | 3 (0.07%)  | 0.041308 |
| carboxylic acid catabolic process                                         | 2 (15.38%) | 46 (1.06%) | 0.041308 |

|                    |                                                                                                 |                 |                   |          |
|--------------------|-------------------------------------------------------------------------------------------------|-----------------|-------------------|----------|
|                    | regulation of T cell activation                                                                 | 1 (7.69%)       | 3 (0.07%)         | 0.041308 |
|                    | regulation of cell activation                                                                   | 1 (7.69%)       | 3 (0.07%)         | 0.041308 |
|                    | negative regulation of cell activation                                                          | 1 (7.69%)       | 3 (0.07%)         | 0.041308 |
|                    | negative regulation of T cell activation                                                        | 1 (7.69%)       | 3 (0.07%)         | 0.041308 |
|                    | regulation of lymphocyte activation                                                             | 1 (7.69%)       | 3 (0.07%)         | 0.041308 |
|                    | negative regulation of lymphocyte activation                                                    | 1 (7.69%)       | 3 (0.07%)         | 0.041308 |
|                    | regulation of leukocyte cell-cell adhesion                                                      | 1 (7.69%)       | 3 (0.07%)         | 0.041308 |
|                    | negative regulation of leukocyte cell-cell adhesion                                             | 1 (7.69%)       | 3 (0.07%)         | 0.041308 |
|                    | regulation of hemopoiesis                                                                       | 1 (7.69%)       | 3 (0.07%)         | 0.041308 |
|                    |                                                                                                 | out of 18 genes | out of 5997 genes |          |
| Cellular component | nucleosome                                                                                      | 2 (11.11%)      | 24 (0.40%)        | 0.031312 |
|                    | DNA packaging complex                                                                           | 2 (11.11%)      | 26 (0.43%)        | 0.033679 |
|                    | protein-DNA complex                                                                             | 2 (11.11%)      | 31 (0.52%)        | 0.036401 |
|                    |                                                                                                 | out of 38 genes | out of 7398 genes |          |
| Molecular function | pigment binding                                                                                 | 5 (13.16%)      | 45 (0.61%)        | 0.000419 |
|                    | formyltetrahydrofolate dehydrogenase activity                                                   | 2 (5.26%)       | 2 (0.03%)         | 0.001119 |
|                    | hydroxymethyl-, formyl- and related transferase activity                                        | 2 (5.26%)       | 8 (0.11%)         | 0.015370 |
|                    | oxidoreductase activity, acting on the CH-NH group of donors, NAD or NADP as acceptor           | 2 (5.26%)       | 15 (0.20%)        | 0.033679 |
|                    | oxidoreductase activity, acting on the CH-NH group of donors                                    | 2 (5.26%)       | 18 (0.24%)        | 0.036401 |
|                    | oxidoreductase activity, acting on the aldehyde or oxo group of donors, NAD or NADP as acceptor | 2 (5.26%)       | 30 (0.41%)        | 0.046470 |
|                    |                                                                                                 |                 |                   |          |

**Table S4. Summary of the KEGG enrichment analysis of the differentially expressed genes in cyflumetofen-resistant strains**

| Pathway                                             | DEGs with<br>pathway<br>annotation (64) | All genes with<br>pathway<br>annotation<br>(6770) | P-value  | Q-value  | Pathway<br>ID |
|-----------------------------------------------------|-----------------------------------------|---------------------------------------------------|----------|----------|---------------|
| Steroid biosynthesis                                | 4 (6.25%)                               | 62 (0.92%)                                        | 0.002688 | 0.117587 | ko00100       |
| Lysosome                                            | 11 (17.19%)                             | 464 (6.85%)                                       | 0.003755 | 0.117587 | ko04142       |
| Salivary secretion                                  | 5 (7.81%)                               | 120 (1.77%)                                       | 0.005332 | 0.117587 | ko04970       |
| Notch signaling pathway                             | 4 (6.25%)                               | 75 (1.11%)                                        | 0.005345 | 0.117587 | ko04330       |
| Autophagy-other                                     | 3 (4.69%)                               | 46 (0.68%)                                        | 0.009159 | 0.161202 | ko04136       |
| One carbon pool by folate                           | 2 (3.13%)                               | 22 (0.32%)                                        | 0.017995 | 0.232801 | ko00670       |
| Lysine degradation                                  | 5 (7.81%)                               | 163 (2.41%)                                       | 0.018518 | 0.232801 | ko00310       |
| mRNA surveillance pathway                           | 4 (6.25%)                               | 120 (1.77%)                                       | 0.026382 | 0.286526 | ko03015       |
| Antigen processing and presentation                 | 4 (6.25%)                               | 124 (1.83%)                                       | 0.029304 | 0.286526 | ko04612       |
| Autophagy-animal                                    | 5 (7.81%)                               | 197 (2.91%)                                       | 0.037868 | 0.333242 | ko04140       |
| Fc gamma R-mediated phagocytosis                    | 3 (4.69%)                               | 89 (1.31%)                                        | 0.051538 | 0.412301 | ko04666       |
| Linoleic acid metabolism                            | 3 (4.69%)                               | 100 (1.48%)                                       | 0.068282 | 0.413588 | ko00591       |
| Folate biosynthesis                                 | 2 (3.13%)                               | 47 (0.69%)                                        | 0.072494 | 0.413588 | ko00790       |
| Regulation of actin cytoskeleton                    | 4 (6.25%)                               | 169 (2.50%)                                       | 0.075115 | 0.413588 | ko04810       |
| Cholesterol metabolism                              | 4 (6.25%)                               | 169 (2.50%)                                       | 0.075115 | 0.413588 | ko04979       |
| Fructose and mannose metabolism                     | 2 (3.13%)                               | 48 (0.71%)                                        | 0.075198 | 0.413588 | ko00051       |
| Galactose metabolism                                | 2 (3.13%)                               | 50 (0.74%)                                        | 0.080702 | 0.417749 | ko00052       |
| Ovarian steroidogenesis                             | 3 (4.69%)                               | 112 (1.65%)                                       | 0.089006 | 0.435143 | ko04913       |
| Arachidonic acid metabolism                         | 3 (4.69%)                               | 119 (1.76%)                                       | 0.102183 | 0.449606 | ko00590       |
| Axon guidance                                       | 3 (4.69%)                               | 119 (1.76%)                                       | 0.102183 | 0.449606 | ko04360       |
| Toll and Imd signaling pathway                      | 2 (3.13%)                               | 70 (1.03%)                                        | 0.141444 | 0.592718 | ko04624       |
| Serotonergic synapse                                | 3 (4.69%)                               | 151 (2.23%)                                       | 0.170882 | 0.626611 | ko04726       |
| Other glycan degradation                            | 2 (3.13%)                               | 79 (1.17%)                                        | 0.17125  | 0.626611 | ko00511       |
| Inflammatory mediator regulation of<br>TRP channels | 3 (4.69%)                               | 153 (2.26%)                                       | 0.175557 | 0.626611 | ko04750       |
| Insulin secretion                                   | 2 (3.13%)                               | 81 (1.20%)                                        | 0.178014 | 0.626611 | ko04911       |
| Circadian rhythm-fly                                | 1 (1.56%)                               | 26 (0.38%)                                        | 0.219186 | 0.714936 | ko04711       |
| Adherens junction                                   | 2 (3.13%)                               | 93 (1.37%)                                        | 0.219355 | 0.714936 | ko04520       |



|                                                           |           |             |          |          |         |
|-----------------------------------------------------------|-----------|-------------|----------|----------|---------|
| Glycerolipid metabolism                                   | 2 (3.13%) | 99 (1.46%)  | 0.240352 | 0.755392 | ko00561 |
| Ribosome biogenesis in eukaryotes                         | 2 (3.13%) | 107 (1.58%) | 0.268496 | 0.781892 | ko03008 |
| ECM-receptor interaction                                  | 2 (3.13%) | 118 (1.74%) | 0.30718  | 0.781892 | ko04512 |
| Prolactin signaling pathway                               | 1 (1.56%) | 39 (0.58%)  | 0.310293 | 0.781892 | ko04917 |
| RNA polymerase                                            | 2 (3.13%) | 119 (1.76%) | 0.310684 | 0.781892 | ko03020 |
| Signaling pathways regulating pluripotency of stem cells  | 2 (3.13%) | 124 (1.83%) | 0.328152 | 0.781892 | ko04550 |
| Pentose phosphate pathway                                 | 1 (1.56%) | 42 (0.62%)  | 0.329783 | 0.781892 | ko00030 |
| Hedgehog signaling pathway-fly                            | 1 (1.56%) | 42 (0.62%)  | 0.329783 | 0.781892 | ko04341 |
| Endocrine and other factor-regulated calcium reabsorption | 1 (1.56%) | 42 (0.62%)  | 0.329783 | 0.781892 | ko04961 |
| B cell receptor signaling pathway                         | 1 (1.56%) | 45 (0.66%)  | 0.34873  | 0.781892 | ko04662 |
| Glycine, serine and threonine metabolism                  | 1 (1.56%) | 46 (0.68%)  | 0.354928 | 0.781892 | ko00260 |
| cGMP-PKG signaling pathway                                | 2 (3.13%) | 134 (1.98%) | 0.362727 | 0.781892 | ko04022 |
| Focal adhesion                                            | 3 (4.69%) | 229 (3.38%) | 0.368759 | 0.781892 | ko04510 |
| Pentose and glucuronate interconversions                  | 2 (3.13%) | 136 (2.01%) | 0.36957  | 0.781892 | ko00040 |
| T cell receptor signaling pathway                         | 1 (1.56%) | 49 (0.72%)  | 0.373176 | 0.781892 | ko04660 |
| ErbB signaling pathway                                    | 1 (1.56%) | 55 (0.81%)  | 0.40816  | 0.827601 | ko04012 |
| Apoptosis-multiple species                                | 1 (1.56%) | 56 (0.83%)  | 0.413801 | 0.827601 | ko04215 |
| Retinol metabolism                                        | 2 (3.13%) | 162 (2.39%) | 0.455588 | 0.840817 | ko00830 |
| Apoptosis                                                 | 2 (3.13%) | 163 (2.41%) | 0.45877  | 0.840817 | ko04210 |
| Leukocyte transendothelial migration                      | 1 (1.56%) | 68 (1.00%)  | 0.477498 | 0.840817 | ko04670 |
| Aminoacyl-tRNA biosynthesis                               | 1 (1.56%) | 69 (1.02%)  | 0.482488 | 0.840817 | ko00970 |
| Longevity regulating pathway-worm                         | 2 (3.13%) | 172 (2.54%) | 0.486928 | 0.840817 | ko04212 |
| IL-17 signaling pathway                                   | 1 (1.56%) | 72 (1.06%)  | 0.497177 | 0.840817 | ko04657 |
| Longevity regulating pathway                              | 1 (1.56%) | 75 (1.11%)  | 0.511455 | 0.840817 | ko04211 |
| Hedgehog signaling pathway                                | 1 (1.56%) | 75 (1.11%)  | 0.511455 | 0.840817 | ko04340 |
| Thyroid hormone signaling pathway                         | 2 (3.13%) | 183 (2.70%) | 0.520117 | 0.840817 | ko04919 |
| GABAergic synapse                                         | 1 (1.56%) | 77 (1.14%)  | 0.520752 | 0.840817 | ko04727 |
| Ubiquitin mediated proteolysis                            | 2 (3.13%) | 187 (2.76%) | 0.531837 | 0.840817 | ko04120 |
| Sphingolipid metabolism                                   | 1 (1.56%) | 83 (1.23%)  | 0.547608 | 0.840817 | ko00600 |
| Melanogenesis                                             | 1 (1.56%) | 88 (1.30%)  | 0.568853 | 0.840817 | ko04916 |
| Spliceosome                                               | 2 (3.13%) | 201 (2.97%) | 0.571342 | 0.840817 | ko03040 |
| Renin secretion                                           | 1 (1.56%) | 90 (1.33%)  | 0.577073 | 0.840817 | ko04924 |

|                                             |           |             |          |          |         |
|---------------------------------------------|-----------|-------------|----------|----------|---------|
| Chemokine signaling pathway                 | 1 (1.56%) | 91 (1.34%)  | 0.581125 | 0.840817 | ko04062 |
| Estrogen signaling pathway                  | 1 (1.56%) | 95 (1.40%)  | 0.596954 | 0.840817 | ko04915 |
| Necroptosis                                 | 1 (1.56%) | 102 (1.51%) | 0.623251 | 0.840817 | ko04217 |
| Neurotrophin signaling pathway              | 1 (1.56%) | 103 (1.52%) | 0.626867 | 0.840817 | ko04722 |
| RNA degradation                             | 1 (1.56%) | 107 (1.58%) | 0.640993 | 0.840817 | ko03018 |
| Dopaminergic synapse                        | 1 (1.56%) | 107 (1.58%) | 0.640993 | 0.840817 | ko04728 |
| Vascular smooth muscle contraction          | 1 (1.56%) | 112 (1.65%) | 0.657912 | 0.840817 | ko04270 |
| Hippo signaling pathway                     | 1 (1.56%) | 112 (1.65%) | 0.657912 | 0.840817 | ko04390 |
| Oxytocin signaling pathway                  | 1 (1.56%) | 118 (1.74%) | 0.67718  | 0.840817 | ko04921 |
| PI3K-Akt signaling pathway                  | 2 (3.13%) | 245 (3.62%) | 0.679785 | 0.840817 | ko04151 |
| NOD-like receptor signaling pathway         | 1 (1.56%) | 120 (1.77%) | 0.683363 | 0.840817 | ko04621 |
| Synaptic vesicle cycle                      | 1 (1.56%) | 121 (1.79%) | 0.68641  | 0.840817 | ko04721 |
| Retrograde endocannabinoid signaling        | 1 (1.56%) | 128 (1.89%) | 0.706948 | 0.840817 | ko04723 |
| Wnt signaling pathway                       | 1 (1.56%) | 132 (1.95%) | 0.718083 | 0.840817 | ko04310 |
| Platelet activation                         | 1 (1.56%) | 132 (1.95%) | 0.718083 | 0.840817 | ko04611 |
| Cell cycle                                  | 1 (1.56%) | 133 (1.96%) | 0.720801 | 0.840817 | ko04110 |
| Pancreatic secretion                        | 1 (1.56%) | 135 (1.99%) | 0.72616  | 0.840817 | ko04972 |
| mTOR signaling pathway                      | 1 (1.56%) | 144 (2.13%) | 0.749049 | 0.855865 | ko04150 |
| Tight junction                              | 1 (1.56%) | 148 (2.19%) | 0.758608 | 0.855865 | ko04530 |
| Insulin signaling pathway                   | 1 (1.56%) | 153 (2.26%) | 0.770053 | 0.85778  | ko04910 |
| Rap1 signaling pathway                      | 1 (1.56%) | 159 (2.35%) | 0.783083 | 0.859753 | ko04015 |
| Neuroactive ligand-receptor interaction     | 1 (1.56%) | 163 (2.41%) | 0.791364 | 0.859753 | ko04080 |
| Calcium signaling pathway                   | 1 (1.56%) | 168 (2.48%) | 0.801278 | 0.859908 | ko04020 |
| Phagosome                                   | 1 (1.56%) | 176 (2.60%) | 0.816184 | 0.865351 | ko04145 |
| MAPK signaling pathway                      | 1 (1.56%) | 182 (2.69%) | 0.826636 | 0.865999 | ko04010 |
| Protein processing in endoplasmic reticulum | 1 (1.56%) | 217 (3.21%) | 0.87692  | 0.907871 | ko04141 |
| cAMP signaling pathway                      | 1 (1.56%) | 228 (3.37%) | 0.889525 | 0.910212 | ko04024 |
| Endocytosis                                 | 1 (1.56%) | 254 (3.75%) | 0.914485 | 0.924997 | ko04144 |

**Table S5. Summary of the KEGG enrichment analysis of the differentially expressed genes in bifenthrin-resistant strains**

| Pathway                                         | DEGs with<br>pathway<br>annotation<br>(224) | All genes<br>with pathway<br>annotation<br>(6770) | P-value  | Q-value  | Pathway<br>ID |
|-------------------------------------------------|---------------------------------------------|---------------------------------------------------|----------|----------|---------------|
| Lysosome                                        | 44 (19.64%)                                 | 464 (6.85%)                                       | 9.42E-11 | 1.79E-08 | ko04142       |
| Antigen processing and presentation             | 18 (8.04%)                                  | 124 (1.83%)                                       | 1.04E-07 | 9.89E-06 | ko04612       |
| Metabolism of xenobiotics by<br>cytochrome P450 | 18 (8.04%)                                  | 142 (2.10%)                                       | 8.34E-07 | 5.28E-05 | ko00980       |
| Pentose and glucuronate<br>interconversions     | 17 (7.59%)                                  | 136 (2.01%)                                       | 2.08E-06 | 9.86E-05 | ko00040       |
| Drug metabolism-other enzymes                   | 21 (9.38%)                                  | 228 (3.37%)                                       | 1.84E-05 | 0.000699 | ko00983       |
| Retinol metabolism                              | 17 (7.59%)                                  | 162 (2.39%)                                       | 2.25E-05 | 0.000711 | ko00830       |
| Apoptosis                                       | 16 (7.14%)                                  | 163 (2.41%)                                       | 8.87E-05 | 0.002408 | ko04210       |
| Arachidonic acid metabolism                     | 13 (5.80%)                                  | 119 (1.76%)                                       | 0.00014  | 0.003334 | ko00590       |
| Autophagy-animal                                | 17 (7.59%)                                  | 197 (2.91%)                                       | 0.000261 | 0.005514 | ko04140       |
| Ascorbate and aldarate metabolism               | 11 (4.91%)                                  | 100 (1.48%)                                       | 0.000431 | 0.008194 | ko00053       |
| Drug metabolism-cytochrome P450                 | 13 (5.80%)                                  | 135 (1.99%)                                       | 0.000493 | 0.008511 | ko00982       |
| Protein export                                  | 8 (3.57%)                                   | 59 (0.87%)                                        | 0.000655 | 0.009827 | ko03060       |
| Phagosome                                       | 15 (6.70%)                                  | 176 (2.60%)                                       | 0.000685 | 0.009827 | ko04145       |
| Renin secretion                                 | 10 (4.46%)                                  | 90 (1.33%)                                        | 0.000724 | 0.009827 | ko04924       |
| One carbon pool by folate                       | 4 (1.79%)                                   | 22 (0.32%)                                        | 0.005337 | 0.065558 | ko00670       |
| Steroid hormone biosynthesis                    | 10 (4.46%)                                  | 118 (1.74%)                                       | 0.005521 | 0.065558 | ko00140       |
| Sphingolipid metabolism                         | 8 (3.57%)                                   | 83 (1.23%)                                        | 0.005915 | 0.066105 | ko00600       |
| Porphyrin and chlorophyll<br>metabolism         | 9 (4.02%)                                   | 103 (1.52%)                                       | 0.006836 | 0.072157 | ko00860       |
| Lysine degradation                              | 12 (5.36%)                                  | 163 (2.41%)                                       | 0.007609 | 0.076092 | ko00310       |
| Pyruvate metabolism                             | 5 (2.23%)                                   | 41 (0.61%)                                        | 0.010766 | 0.102276 | ko00620       |
| Protein processing in endoplasmic<br>reticulum  | 14 (6.25%)                                  | 217 (3.21%)                                       | 0.012586 | 0.113876 | ko04141       |
| Other glycan degradation                        | 7 (3.13%)                                   | 79 (1.17%)                                        | 0.015213 | 0.131385 | ko00511       |
| Linoleic acid metabolism                        | 8 (3.57%)                                   | 100 (1.48%)                                       | 0.017332 | 0.133859 | ko00591       |
| NOD-like receptor signaling<br>pathway          | 9 (4.02%)                                   | 120 (1.77%)                                       | 0.017613 | 0.133859 | ko04621       |
| Salivary secretion                              | 9 (4.02%)                                   | 120 (1.77%)                                       | 0.017613 | 0.133859 | ko04970       |

|                                                  |            |             |          |          |         |
|--------------------------------------------------|------------|-------------|----------|----------|---------|
| Cholesterol metabolism                           | 11 (4.91%) | 169 (2.50%) | 0.024122 | 0.169746 | ko04979 |
| Citrate cycle (TCA cycle)                        | 4 (1.79%)  | 37 (0.55%)  | 0.032806 | 0.22261  | ko00020 |
| Glycerophospholipid metabolism                   | 9 (4.02%)  | 143 (2.11%) | 0.047102 | 0.308602 | ko00564 |
| Proximal tubule bicarbonate reclamation          | 3 (1.34%)  | 26 (0.38%)  | 0.053099 | 0.327659 | ko04964 |
| Steroid biosynthesis                             | 5 (2.23%)  | 62 (0.92%)  | 0.05346  | 0.327659 | ko00100 |
| Glycine, serine and threonine metabolism         | 4 (1.79%)  | 46 (0.68%)  | 0.064581 | 0.383448 | ko00260 |
| Fc gamma R-mediated phagocytosis                 | 6 (2.68%)  | 89 (1.31%)  | 0.073769 | 0.424732 | ko04666 |
| Glyoxylate and dicarboxylate metabolism          | 3 (1.34%)  | 31 (0.46%)  | 0.081523 | 0.45557  | ko00630 |
| Adherens junction                                | 6 (2.68%)  | 93 (1.37%)  | 0.087032 | 0.47246  | ko04520 |
| alpha-Linolenic acid metabolism                  | 2 (0.89%)  | 17 (0.25%)  | 0.107087 | 0.565184 | ko00592 |
| Selenocompound metabolism                        | 2 (0.89%)  | 19 (0.28%)  | 0.129071 | 0.662795 | ko00450 |
| Glycolysis / Gluconeogenesis                     | 4 (1.79%)  | 62 (0.92%)  | 0.148435 | 0.728343 | ko00010 |
| Peroxisome                                       | 7 (3.13%)  | 133 (1.96%) | 0.151052 | 0.728343 | ko04146 |
| Valine, leucine and isoleucine biosynthesis      | 1 (0.45%)  | 5 (0.07%)   | 0.154887 | 0.728343 | ko00290 |
| Pancreatic secretion                             | 7 (3.13%)  | 135 (1.99%) | 0.159402 | 0.728343 | ko04972 |
| Pentose phosphate pathway                        | 3 (1.34%)  | 42 (0.62%)  | 0.161002 | 0.728343 | ko00030 |
| Cholinergic synapse                              | 6 (2.68%)  | 113 (1.67%) | 0.1708   | 0.754697 | ko04725 |
| Glutathione metabolism                           | 4 (1.79%)  | 67 (0.99%)  | 0.180507 | 0.779463 | ko00480 |
| Protein digestion and absorption                 | 7 (3.13%)  | 142 (2.10%) | 0.190209 | 0.802418 | ko04974 |
| Toll and Imd signaling pathway                   | 4 (1.79%)  | 70 (1.03%)  | 0.20077  | 0.802418 | ko04624 |
| Axon guidance                                    | 6 (2.68%)  | 119 (1.76%) | 0.200859 | 0.802418 | ko04360 |
| Cysteine and methionine metabolism               | 3 (1.34%)  | 47 (0.69%)  | 0.202716 | 0.802418 | ko00270 |
| C-type lectin receptor signaling pathway         | 4 (1.79%)  | 72 (1.06%)  | 0.214641 | 0.804029 | ko04625 |
| T cell receptor signaling pathway                | 3 (1.34%)  | 49 (0.72%)  | 0.220059 | 0.804029 | ko04660 |
| Adipocytokine signaling pathway                  | 3 (1.34%)  | 49 (0.72%)  | 0.220059 | 0.804029 | ko04920 |
| Insect hormone biosynthesis                      | 2 (0.89%)  | 27 (0.40%)  | 0.224282 | 0.804029 | ko00981 |
| Carbohydrate digestion and absorption            | 2 (0.89%)  | 27 (0.40%)  | 0.224282 | 0.804029 | ko04973 |
| Longevity regulating pathway                     | 4 (1.79%)  | 75 (1.11%)  | 0.235922 | 0.824272 | ko04211 |
| Inflammatory mediator regulation of TRP channels | 7 (3.13%)  | 153 (2.26%) | 0.242943 | 0.824272 | ko04750 |
| Insulin signaling pathway                        | 7 (3.13%)  | 153 (2.26%) | 0.242943 | 0.824272 | ko04910 |

|                                           |           |             |          |          |         |
|-------------------------------------------|-----------|-------------|----------|----------|---------|
| Retrograde endocannabinoid signaling      | 6 (2.68%) | 128 (1.89%) | 0.24919  | 0.830634 | ko04723 |
| ErbB signaling pathway                    | 3 (1.34%) | 55 (0.81%)  | 0.273598 | 0.878341 | ko04012 |
| Ether lipid metabolism                    | 2 (0.89%) | 31 (0.46%)  | 0.273815 | 0.878341 | ko00565 |
| Cell cycle                                | 6 (2.68%) | 133 (1.96%) | 0.277371 | 0.878341 | ko04110 |
| Fatty acid biosynthesis                   | 2 (0.89%) | 33 (0.49%)  | 0.298587 | 0.923748 | ko00061 |
| Collecting duct acid secretion            | 2 (0.89%) | 34 (0.50%)  | 0.310929 | 0.923748 | ko04966 |
| Ovarian steroidogenesis                   | 5 (2.23%) | 112 (1.65%) | 0.312367 | 0.923748 | ko04913 |
| Glucagon signaling pathway                | 4 (1.79%) | 86 (1.27%)  | 0.317317 | 0.923748 | ko04922 |
| Regulation of actin cytoskeleton          | 7 (3.13%) | 169 (2.50%) | 0.326409 | 0.923748 | ko04810 |
| Histidine metabolism                      | 1 (0.45%) | 12 (0.18%)  | 0.332421 | 0.923748 | ko00340 |
| Sulfur relay system                       | 1 (0.45%) | 12 (0.18%)  | 0.332421 | 0.923748 | ko04122 |
| Starch and sucrose metabolism             | 2 (0.89%) | 36 (0.53%)  | 0.335466 | 0.923748 | ko00500 |
| Hippo signaling pathway-multiple species  | 2 (0.89%) | 36 (0.53%)  | 0.335466 | 0.923748 | ko04392 |
| Cellular senescence                       | 5 (2.23%) | 119 (1.76%) | 0.358529 | 0.962693 | ko04218 |
| Natural killer cell mediated cytotoxicity | 2 (0.89%) | 38 (0.56%)  | 0.359743 | 0.962693 | ko04650 |
| Prolactin signaling pathway               | 2 (0.89%) | 39 (0.58%)  | 0.371762 | 0.981038 | ko04917 |
| Serotonergic synapse                      | 6 (2.68%) | 151 (2.23%) | 0.383256 | 0.997157 | ko04726 |
| Nitrogen metabolism                       | 1 (0.45%) | 15 (0.22%)  | 0.396636 | 0.997157 | ko00910 |
| Aminoacyl-tRNA biosynthesis               | 3 (1.34%) | 69 (1.02%)  | 0.40105  | 0.997157 | ko00970 |
| Tryptophan metabolism                     | 2 (0.89%) | 42 (0.62%)  | 0.407246 | 0.997157 | ko00380 |
| Renin-angiotensin system                  | 1 (0.45%) | 16 (0.24%)  | 0.416644 | 0.997157 | ko04614 |
| Nicotinate and nicotinamide metabolism    | 1 (0.45%) | 17 (0.25%)  | 0.435992 | 0.997157 | ko00760 |
| Necroptosis                               | 4 (1.79%) | 102 (1.51%) | 0.438098 | 0.997157 | ko04217 |
| B cell receptor signaling pathway         | 2 (0.89%) | 45 (0.66%)  | 0.441739 | 0.997157 | ko04662 |
| Neurotrophin signaling pathway            | 4 (1.79%) | 103 (1.52%) | 0.445516 | 0.997157 | ko04722 |
| Autophagy-other                           | 2 (0.89%) | 46 (0.68%)  | 0.452993 | 0.997157 | ko04136 |
| Hedgehog signaling pathway                | 3 (1.34%) | 75 (1.11%)  | 0.454177 | 0.997157 | ko04340 |
| cGMP-PKG signaling pathway                | 5 (2.23%) | 134 (1.98%) | 0.45743  | 0.997157 | ko04022 |
| Ribosome biogenesis in eukaryotes         | 4 (1.79%) | 107 (1.58%) | 0.474872 | 0.997157 | ko03008 |
| Fructose and mannose metabolism           | 2 (0.89%) | 48 (0.71%)  | 0.475106 | 0.997157 | ko00051 |
| AMPK signaling pathway                    | 5 (2.23%) | 137 (2.02%) | 0.476812 | 0.997157 | ko04152 |
| Osteoclast differentiation                | 2 (0.89%) | 49 (0.72%)  | 0.485959 | 0.997157 | ko04380 |

|                                                        |           |             |          |          |         |
|--------------------------------------------------------|-----------|-------------|----------|----------|---------|
| Carbon metabolism                                      | 5 (2.23%) | 140 (2.07%) | 0.495967 | 0.997157 | ko01200 |
| Galactose metabolism                                   | 2 (0.89%) | 50 (0.74%)  | 0.496672 | 0.997157 | ko00052 |
| Aldosterone-regulated sodium reabsorption              | 1 (0.45%) | 21 (0.31%)  | 0.507199 | 0.997157 | ko04960 |
| Fat digestion and absorption                           | 3 (1.34%) | 82 (1.21%)  | 0.51355  | 0.997157 | ko04975 |
| Toll-like receptor signaling pathway                   | 2 (0.89%) | 52 (0.77%)  | 0.517669 | 0.997157 | ko04620 |
| Sphingolipid signaling pathway                         | 5 (2.23%) | 145 (2.14%) | 0.527292 | 0.997157 | ko04071 |
| FoxO signaling pathway                                 | 3 (1.34%) | 85 (1.26%)  | 0.537938 | 0.997157 | ko04068 |
| Longevity regulating pathway-multiple species          | 3 (1.34%) | 85 (1.26%)  | 0.537938 | 0.997157 | ko04213 |
| Phototransduction                                      | 1 (0.45%) | 23 (0.34%)  | 0.53937  | 0.997157 | ko04744 |
| N-Glycan biosynthesis                                  | 2 (0.89%) | 57 (0.84%)  | 0.567565 | 0.997157 | ko00510 |
| Circadian rhythm-fly                                   | 1 (0.45%) | 26 (0.38%)  | 0.583749 | 0.997157 | ko04711 |
| Chemokine signaling pathway                            | 3 (1.34%) | 91 (1.34%)  | 0.584557 | 0.997157 | ko04062 |
| Oxidative phosphorylation                              | 4 (1.79%) | 124 (1.83%) | 0.5918   | 0.997157 | ko00190 |
| Hematopoietic cell lineage                             | 1 (0.45%) | 27 (0.40%)  | 0.597575 | 0.997157 | ko04640 |
| Ras signaling pathway                                  | 5 (2.23%) | 159 (2.35%) | 0.610007 | 0.997157 | ko04014 |
| Glycosylphosphatidylinositol (GPI)-anchor biosynthesis | 1 (0.45%) | 28 (0.41%)  | 0.610943 | 0.997157 | ko00563 |
| Estrogen signaling pathway                             | 3 (1.34%) | 95 (1.40%)  | 0.613935 | 0.997157 | ko04915 |
| Gastric acid secretion                                 | 2 (0.89%) | 64 (0.95%)  | 0.631006 | 0.997157 | ko04971 |
| Fc epsilon RI signaling pathway                        | 1 (0.45%) | 30 (0.44%)  | 0.636368 | 0.997157 | ko04664 |
| Glycerolipid metabolism                                | 3 (1.34%) | 99 (1.46%)  | 0.641893 | 0.997157 | ko00561 |
| VEGF signaling pathway                                 | 1 (0.45%) | 31 (0.46%)  | 0.648453 | 0.997157 | ko04370 |
| Calcium signaling pathway                              | 5 (2.23%) | 168 (2.48%) | 0.658555 | 0.997157 | ko04020 |
| Vitamin digestion and absorption                       | 4 (1.79%) | 135 (1.99%) | 0.658778 | 0.997157 | ko04977 |
| PPAR signaling pathway                                 | 2 (0.89%) | 69 (1.02%)  | 0.671741 | 0.997157 | ko03320 |
| Mannose type O-glycan biosynthesis                     | 1 (0.45%) | 35 (0.52%)  | 0.692924 | 0.997157 | ko00515 |
| beta-Alanine metabolism                                | 1 (0.45%) | 36 (0.53%)  | 0.703137 | 0.997157 | ko00410 |
| p53 signaling pathway                                  | 1 (0.45%) | 36 (0.53%)  | 0.703137 | 0.997157 | ko04115 |
| Th17 cell differentiation                              | 1 (0.45%) | 36 (0.53%)  | 0.703137 | 0.997157 | ko04659 |
| Progesterone-mediated oocyte maturation                | 2 (0.89%) | 74 (1.09%)  | 0.70877  | 0.997157 | ko04914 |
| Thyroid hormone synthesis                              | 2 (0.89%) | 76 (1.12%)  | 0.72258  | 0.997157 | ko04918 |
| Vascular smooth muscle contraction                     | 3 (1.34%) | 112 (1.65%) | 0.722758 | 0.997157 | ko04270 |
| Hippo signaling pathway                                | 3 (1.34%) | 112 (1.65%) | 0.722758 | 0.997157 | ko04390 |

|                                                          |           |             |          |          |         |
|----------------------------------------------------------|-----------|-------------|----------|----------|---------|
| Biosynthesis of amino acids                              | 2 (0.89%) | 77 (1.14%)  | 0.729277 | 0.997157 | ko01230 |
| GABAergic synapse                                        | 2 (0.89%) | 77 (1.14%)  | 0.729277 | 0.997157 | ko04727 |
| HIF-1 signaling pathway                                  | 2 (0.89%) | 80 (1.18%)  | 0.748551 | 0.997157 | ko04066 |
| Jak-STAT signaling pathway                               | 1 (0.45%) | 41 (0.61%)  | 0.749347 | 0.997157 | ko04630 |
| Hedgehog signaling pathway-fly                           | 1 (0.45%) | 42 (0.62%)  | 0.757691 | 0.997157 | ko04341 |
| mRNA surveillance pathway                                | 3 (1.34%) | 120 (1.77%) | 0.765047 | 0.997157 | ko03015 |
| Arginine and proline metabolism                          | 1 (0.45%) | 43 (0.64%)  | 0.765758 | 0.997157 | ko00330 |
| Synaptic vesicle cycle                                   | 3 (1.34%) | 121 (1.79%) | 0.769948 | 0.997157 | ko04721 |
| Cell adhesion molecules (CAMs)                           | 2 (0.89%) | 84 (1.24%)  | 0.772414 | 0.997157 | ko04514 |
| cAMP signaling pathway                                   | 6 (2.68%) | 228 (3.37%) | 0.7726   | 0.997157 | ko04024 |
| Focal adhesion                                           | 6 (2.68%) | 229 (3.38%) | 0.776181 | 0.997157 | ko04510 |
| Rap1 signaling pathway                                   | 4 (1.79%) | 159 (2.35%) | 0.777835 | 0.997157 | ko04015 |
| Phototransduction-fly                                    | 1 (0.45%) | 45 (0.66%)  | 0.781099 | 0.997157 | ko04745 |
| RNA transport                                            | 7 (3.13%) | 265 (3.91%) | 0.781234 | 0.997157 | ko03013 |
| ABC transporters                                         | 3 (1.34%) | 124 (1.83%) | 0.784155 | 0.997157 | ko02010 |
| Signaling pathways regulating pluripotency of stem cells | 3 (1.34%) | 124 (1.83%) | 0.784155 | 0.997157 | ko04550 |
| Mineral absorption                                       | 1 (0.45%) | 46 (0.68%)  | 0.788391 | 0.997157 | ko04978 |
| Glutamatergic synapse                                    | 2 (0.89%) | 88 (1.30%)  | 0.794287 | 0.997157 | ko04724 |
| Melanogenesis                                            | 2 (0.89%) | 88 (1.30%)  | 0.794287 | 0.997157 | ko04916 |
| Folate biosynthesis                                      | 1 (0.45%) | 47 (0.69%)  | 0.79544  | 0.997157 | ko00790 |
| Bile secretion                                           | 2 (0.89%) | 91 (1.34%)  | 0.809456 | 0.997157 | ko04976 |
| Platelet activation                                      | 3 (1.34%) | 132 (1.95%) | 0.818538 | 0.997157 | ko04611 |
| Hippo signaling pathway-fly                              | 2 (0.89%) | 93 (1.37%)  | 0.81901  | 0.997157 | ko04391 |
| Olfactory transduction                                   | 1 (0.45%) | 51 (0.75%)  | 0.821376 | 0.997157 | ko04740 |
| PI3K-Akt signaling pathway                               | 6 (2.68%) | 245 (3.62%) | 0.82787  | 0.997157 | ko04151 |
| Fatty acid metabolism                                    | 3 (1.34%) | 137 (2.02%) | 0.837588 | 0.997157 | ko01212 |
| Phosphatidylinositol signaling system                    | 2 (0.89%) | 98 (1.45%)  | 0.841049 | 0.997157 | ko04070 |
| Fatty acid degradation                                   | 1 (0.45%) | 55 (0.81%)  | 0.844036 | 0.997157 | ko00071 |
| Regulation of lipolysis in adipocytes                    | 1 (0.45%) | 55 (0.81%)  | 0.844036 | 0.997157 | ko04923 |
| Apoptosis-multiple species                               | 1 (0.45%) | 56 (0.83%)  | 0.849238 | 0.997157 | ko04215 |
| Th1 and Th2 cell differentiation                         | 1 (0.45%) | 56 (0.83%)  | 0.849238 | 0.997157 | ko04658 |
| TNF signaling pathway                                    | 1 (0.45%) | 56 (0.83%)  | 0.849238 | 0.997157 | ko04668 |
| Fatty acid elongation                                    | 1 (0.45%) | 60 (0.89%)  | 0.868377 | 0.997157 | ko00062 |

|                                                     |           |             |          |          |         |
|-----------------------------------------------------|-----------|-------------|----------|----------|---------|
| Oocyte meiosis                                      | 2 (0.89%) | 106 (1.57%) | 0.871309 | 0.997157 | ko04114 |
| Long-term potentiation                              | 1 (0.45%) | 61 (0.90%)  | 0.872771 | 0.997157 | ko04720 |
| Dopaminergic synapse                                | 2 (0.89%) | 107 (1.58%) | 0.874697 | 0.997157 | ko04728 |
| TGF-beta signaling pathway                          | 1 (0.45%) | 63 (0.93%)  | 0.881126 | 0.997157 | ko04350 |
| Complement and coagulation cascades                 | 1 (0.45%) | 63 (0.93%)  | 0.881126 | 0.997157 | ko04610 |
| Apoptosis-fly                                       | 1 (0.45%) | 65 (0.96%)  | 0.888934 | 0.997157 | ko04214 |
| Ribosome                                            | 3 (1.34%) | 157 (2.32%) | 0.897533 | 0.997157 | ko03010 |
| Leukocyte transendothelial migration                | 1 (0.45%) | 68 (1.00%)  | 0.899699 | 0.997157 | ko04670 |
| ECM-receptor interaction                            | 2 (0.89%) | 118 (1.74%) | 0.906909 | 0.997157 | ko04512 |
| RNA polymerase                                      | 2 (0.89%) | 119 (1.76%) | 0.909419 | 0.997157 | ko03020 |
| GnRH signaling pathway                              | 1 (0.45%) | 71 (1.05%)  | 0.909425 | 0.997157 | ko04912 |
| IL-17 signaling pathway                             | 1 (0.45%) | 72 (1.06%)  | 0.912454 | 0.997157 | ko04657 |
| Circadian entrainment                               | 1 (0.45%) | 72 (1.06%)  | 0.912454 | 0.997157 | ko04713 |
| Valine, leucine and isoleucine degradation          | 1 (0.45%) | 73 (1.08%)  | 0.915382 | 0.997157 | ko00280 |
| Purine metabolism                                   | 2 (0.89%) | 122 (1.80%) | 0.916576 | 0.997157 | ko00230 |
| Relaxin signaling pathway                           | 2 (0.89%) | 123 (1.82%) | 0.918842 | 0.997157 | ko04926 |
| Notch signaling pathway                             | 1 (0.45%) | 75 (1.11%)  | 0.920948 | 0.997157 | ko04330 |
| Aldosterone synthesis and secretion                 | 2 (0.89%) | 124 (1.83%) | 0.92105  | 0.997157 | ko04925 |
| Adrenergic signaling in cardiomyocytes              | 2 (0.89%) | 125 (1.85%) | 0.923201 | 0.997157 | ko04261 |
| Endocytosis                                         | 5 (2.23%) | 254 (3.75%) | 0.928467 | 0.997157 | ko04144 |
| Insulin secretion                                   | 1 (0.45%) | 81 (1.20%)  | 0.935553 | 0.997157 | ko04911 |
| Wnt signaling pathway                               | 2 (0.89%) | 132 (1.95%) | 0.936789 | 0.997157 | ko04310 |
| MAPK signaling pathway                              | 3 (1.34%) | 182 (2.69%) | 0.944242 | 0.997157 | ko04010 |
| Thyroid hormone signaling pathway                   | 3 (1.34%) | 183 (2.70%) | 0.945619 | 0.997157 | ko04919 |
| Parathyroid hormone synthesis, secretion and action | 1 (0.45%) | 87 (1.29%)  | 0.947469 | 0.997157 | ko04928 |
| Basal transcription factors                         | 1 (0.45%) | 89 (1.31%)  | 0.950932 | 0.997157 | ko03022 |
| mTOR signaling pathway                              | 2 (0.89%) | 144 (2.13%) | 0.954948 | 0.997157 | ko04150 |
| Spliceosome                                         | 3 (1.34%) | 201 (2.97%) | 0.965594 | 0.997157 | ko03040 |
| Phospholipase D signaling pathway                   | 1 (0.45%) | 104 (1.54%) | 0.970596 | 0.997157 | ko04072 |
| RNA degradation                                     | 1 (0.45%) | 107 (1.58%) | 0.973462 | 0.997157 | ko03018 |
| Neuroactive ligand-receptor interaction             | 2 (0.89%) | 163 (2.41%) | 0.973939 | 0.997157 | ko04080 |



|                                             |           |             |          |          |         |
|---------------------------------------------|-----------|-------------|----------|----------|---------|
| Apelin signaling pathway                    | 1 (0.45%) | 111 (1.64%) | 0.976856 | 0.997157 | ko04371 |
| Oxytocin signaling pathway                  | 1 (0.45%) | 118 (1.74%) | 0.981787 | 0.997157 | ko04921 |
| Amino sugar and nucleotide sugar metabolism | 1 (0.45%) | 126 (1.86%) | 0.986155 | 0.997157 | ko00520 |
| Thermogenesis                               | 3 (1.34%) | 239 (3.53%) | 0.987451 | 0.997157 | ko04714 |
| Tight junction                              | 1 (0.45%) | 148 (2.19%) | 0.993497 | 0.997157 | ko04530 |
| Longevity regulating pathway-worm           | 1 (0.45%) | 172 (2.54%) | 0.997157 | 0.997157 | ko04212 |

**Table S6. Summary of the KEGG enrichment analysis of the common DEGs between the Lab\_SS-vs-R\_cfm group and the Lab\_SS-vs-R\_bft group of *T. urticae***

| Pathway                                     | DEGs with<br>pathway<br>annotation<br>(34) | All genes with<br>pathway<br>annotation<br>(6770) | P-value  | Q-value  | Pathway<br>ID |
|---------------------------------------------|--------------------------------------------|---------------------------------------------------|----------|----------|---------------|
| Salivary secretion                          | 4 (11.76%)                                 | 120 (1.77%)                                       | 0.002887 | 0.087766 | ko04970       |
| Antigen processing and presentation         | 4 (11.76%)                                 | 124 (1.83%)                                       | 0.003251 | 0.087766 | ko04612       |
| One carbon pool by folate                   | 2 (5.88%)                                  | 22 (0.32%)                                        | 0.005311 | 0.095591 | ko00670       |
| Lysosome                                    | 7 (20.59%)                                 | 464 (6.85%)                                       | 0.007219 | 0.097454 | ko04142       |
| Fc gamma R-mediated phagocytosis            | 3 (8.82%)                                  | 89 (1.31%)                                        | 0.009793 | 0.105765 | ko04666       |
| Steroid biosynthesis                        | 2 (5.88%)                                  | 62 (0.92%)                                        | 0.038372 | 0.345350 | ko00100       |
| Regulation of actin cytoskeleton            | 3 (8.82%)                                  | 169 (2.50%)                                       | 0.051979 | 0.400980 | ko04810       |
| Autophagy - animal                          | 3 (8.82%)                                  | 197 (2.91%)                                       | 0.075138 | 0.473341 | ko04140       |
| Adherens junction                           | 2 (5.88%)                                  | 93 (1.37%)                                        | 0.078890 | 0.473341 | ko04520       |
| Ribosome biogenesis in eukaryotes           | 2 (5.88%)                                  | 107 (1.58%)                                       | 0.100189 | 0.541020 | ko03008       |
| Pentose phosphate pathway                   | 1 (2.94%)                                  | 42 (0.62%)                                        | 0.191122 | 0.634548 | ko00030       |
| Lysine degradation                          | 2 (5.88%)                                  | 163 (2.41%)                                       | 0.196898 | 0.634548 | ko00310       |
| Apoptosis                                   | 2 (5.88%)                                  | 163 (2.41%)                                       | 0.196898 | 0.634548 | ko04210       |
| Glycine, serine and threonine<br>metabolism | 1 (2.94%)                                  | 46 (0.68%)                                        | 0.207352 | 0.634548 | ko00260       |
| Autophagy - other                           | 1 (2.94%)                                  | 46 (0.68%)                                        | 0.207352 | 0.634548 | ko04136       |
| Cholesterol metabolism                      | 2 (5.88%)                                  | 169 (2.50%)                                       | 0.207941 | 0.634548 | ko04979       |
| Folate biosynthesis                         | 1 (2.94%)                                  | 47 (0.69%)                                        | 0.211360 | 0.634548 | ko00790       |
| Fructose and mannose metabolism             | 1 (2.94%)                                  | 48 (0.71%)                                        | 0.215349 | 0.634548 | ko00051       |
| Galactose metabolism                        | 1 (2.94%)                                  | 50 (0.74%)                                        | 0.223267 | 0.634548 | ko00052       |
| Toll and Imd signaling pathway              | 1 (2.94%)                                  | 70 (1.03%)                                        | 0.298300 | 0.653003 | ko04624       |
| Longevity regulating pathway                | 1 (2.94%)                                  | 75 (1.11%)                                        | 0.315930 | 0.653003 | ko04211       |
| Notch signaling pathway                     | 1 (2.94%)                                  | 75 (1.11%)                                        | 0.315930 | 0.653003 | ko04330       |
| GABAergic synapse                           | 1 (2.94%)                                  | 77 (1.14%)                                        | 0.322861 | 0.653003 | ko04727       |
| Other glycan degradation                    | 1 (2.94%)                                  | 79 (1.17%)                                        | 0.329724 | 0.653003 | ko00511       |
| Sphingolipid metabolism                     | 1 (2.94%)                                  | 83 (1.23%)                                        | 0.343247 | 0.653003 | ko00600       |
| Renin secretion                             | 1 (2.94%)                                  | 90 (1.33%)                                        | 0.366278 | 0.653003 | ko04924       |
| Estrogen signaling pathway                  | 1 (2.94%)                                  | 95 (1.40%)                                        | 0.382247 | 0.653003 | ko04915       |
| Glycerolipid metabolism                     | 1 (2.94%)                                  | 99 (1.46%)                                        | 0.394741 | 0.653003 | ko00561       |

|                                                  |           |             |          |          |         |
|--------------------------------------------------|-----------|-------------|----------|----------|---------|
| Linoleic acid metabolism                         | 1 (2.94%) | 100 (1.48%) | 0.397826 | 0.653003 | ko00591 |
| RNA degradation                                  | 1 (2.94%) | 107 (1.58%) | 0.418996 | 0.653003 | ko03018 |
| Ovarian steroidogenesis                          | 1 (2.94%) | 112 (1.65%) | 0.433674 | 0.653003 | ko04913 |
| ECM-receptor interaction                         | 1 (2.94%) | 118 (1.74%) | 0.450812 | 0.653003 | ko04512 |
| Arachidonic acid metabolism                      | 1 (2.94%) | 119 (1.76%) | 0.453619 | 0.653003 | ko00590 |
| RNA polymerase                                   | 1 (2.94%) | 119 (1.76%) | 0.453619 | 0.653003 | ko03020 |
| Axon guidance                                    | 1 (2.94%) | 119 (1.76%) | 0.453619 | 0.653003 | ko04360 |
| mRNA surveillance pathway                        | 1 (2.94%) | 120 (1.77%) | 0.456412 | 0.653003 | ko03015 |
| NOD-like receptor signaling pathway              | 1 (2.94%) | 120 (1.77%) | 0.456412 | 0.653003 | ko04621 |
| Retrograde endocannabinoid signaling             | 1 (2.94%) | 128 (1.89%) | 0.478264 | 0.653003 | ko04723 |
| cGMP-PKG signaling pathway                       | 1 (2.94%) | 134 (1.98%) | 0.494090 | 0.653003 | ko04022 |
| Pancreatic secretion                             | 1 (2.94%) | 135 (1.99%) | 0.496682 | 0.653003 | ko04972 |
| Pentose and glucuronate interconversions         | 1 (2.94%) | 136 (2.01%) | 0.499262 | 0.653003 | ko00040 |
| Serotonergic synapse                             | 1 (2.94%) | 151 (2.23%) | 0.536444 | 0.653003 | ko04726 |
| Inflammatory mediator regulation of TRP channels | 1 (2.94%) | 153 (2.26%) | 0.541194 | 0.653003 | ko04750 |
| Rap1 signaling pathway                           | 1 (2.94%) | 159 (2.35%) | 0.555164 | 0.653003 | ko04015 |
| Retinol metabolism                               | 1 (2.94%) | 162 (2.39%) | 0.561993 | 0.653003 | ko00830 |
| Neuroactive ligand-receptor interaction          | 1 (2.94%) | 163 (2.41%) | 0.564247 | 0.653003 | ko04080 |
| Calcium signaling pathway                        | 1 (2.94%) | 168 (2.48%) | 0.575347 | 0.653003 | ko04020 |
| Longevity regulating pathway - worm              | 1 (2.94%) | 172 (2.54%) | 0.584030 | 0.653003 | ko04212 |
| Phagosome                                        | 1 (2.94%) | 176 (2.60%) | 0.592540 | 0.653003 | ko04145 |
| MAPK signaling pathway                           | 1 (2.94%) | 182 (2.69%) | 0.604988 | 0.653387 | ko04010 |
| Spliceosome                                      | 1 (2.94%) | 201 (2.97%) | 0.642023 | 0.679789 | ko03040 |
| Focal adhesion                                   | 1 (2.94%) | 229 (3.38%) | 0.690527 | 0.717086 | ko04510 |
| PI3K-Akt signaling pathway                       | 1 (2.94%) | 245 (3.62%) | 0.715313 | 0.728810 | ko04151 |

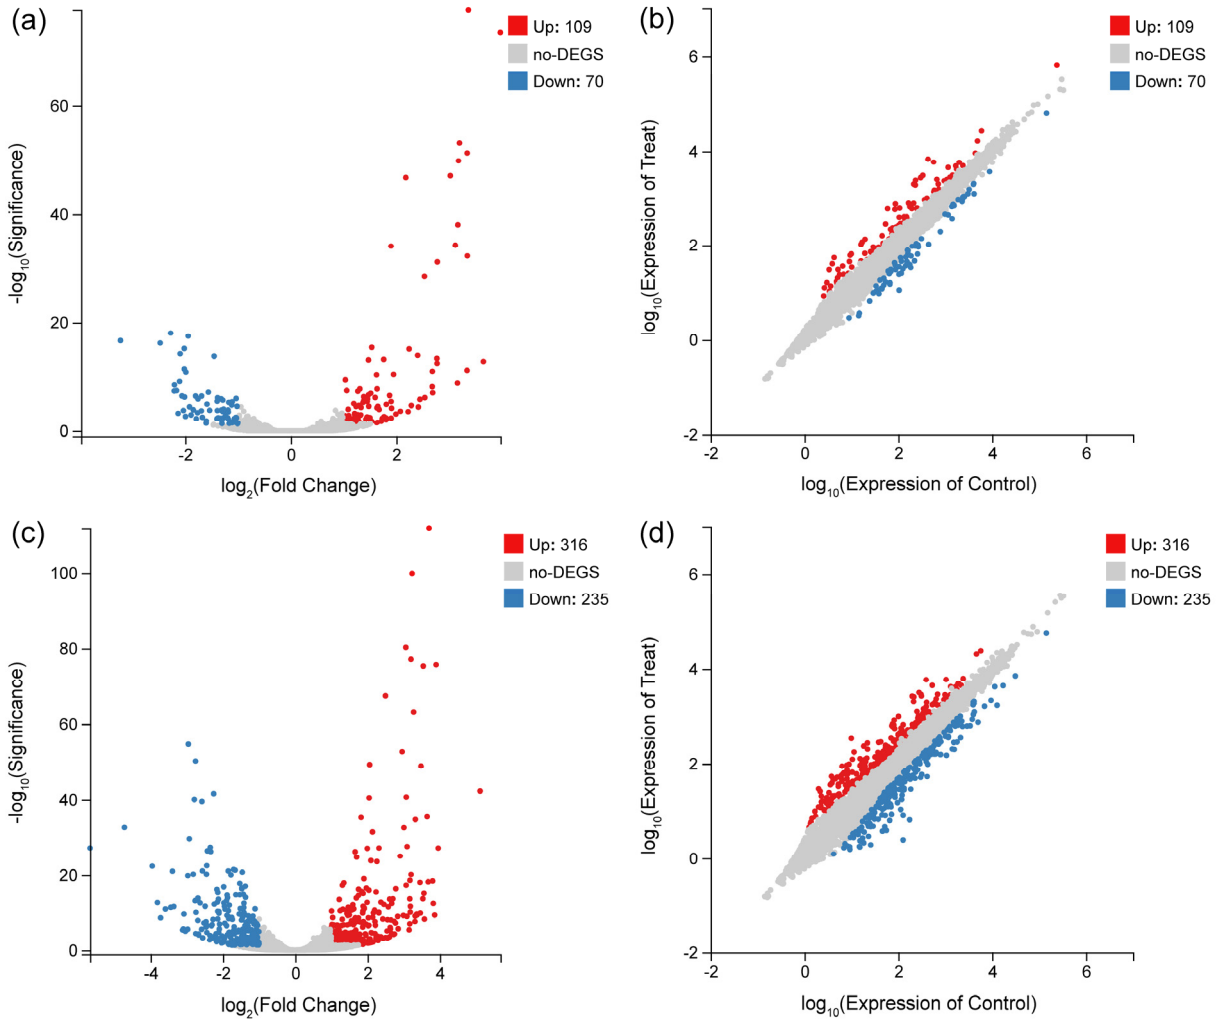

**Figure S1.** RNA-Seq analysis to identify genes differentially expressed in mites of Lab\_SS-vs-R\_cfm group and Lab\_SS-vs-R\_bft group. (a, b) Volcano and scatter plot for the Lab\_SS-vs-R\_cfm group; (c, d) Volcano and scatter for the Lab\_SS-vs-R\_bft group.

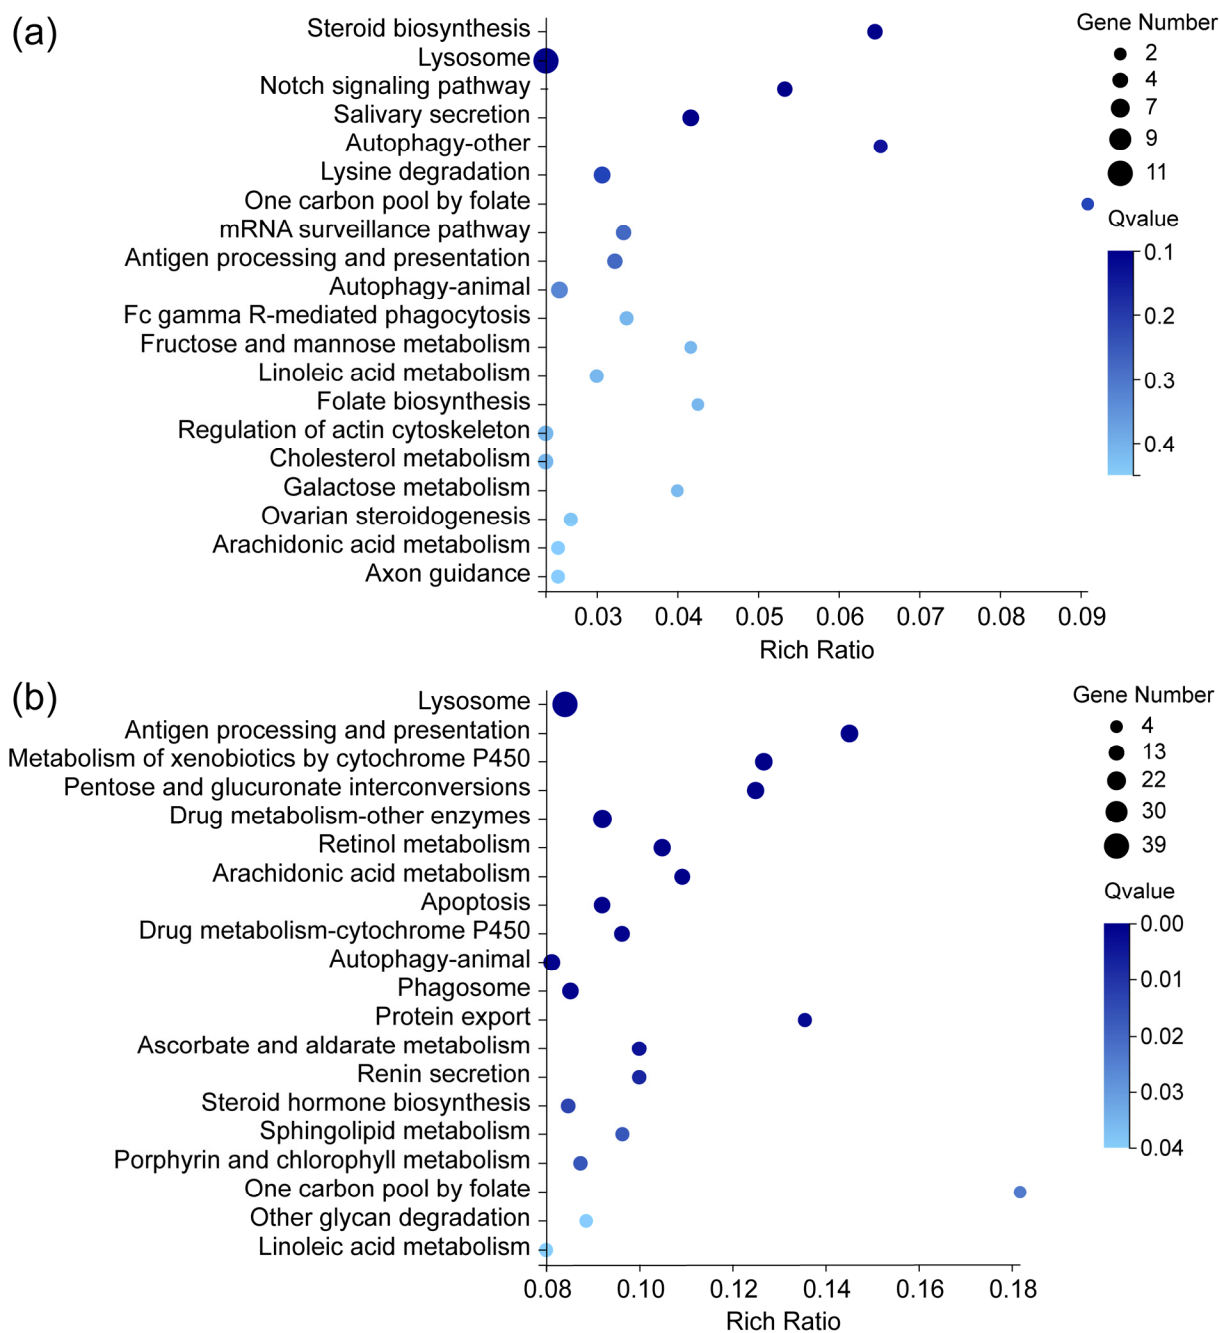

**Figure S2.** The top 20 biological metabolic pathways obtained from the cyflumetofen- ( $R_{cfm}$ ; a) and bifenthrin-resistant ( $R_{bft}$ ; b) strains of *T. urticae* in the KEGG database.

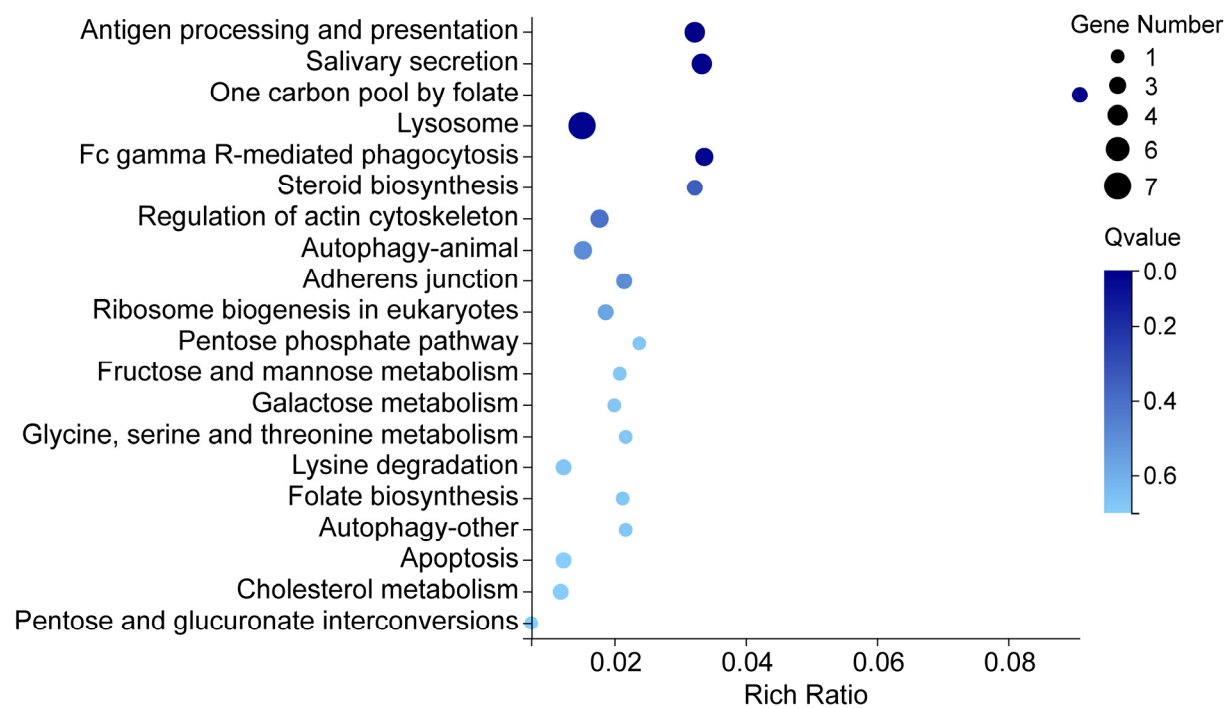

**Figure S3.** KEGG analysis of the common differentially expressed genes to the Lab\_SS-vs-R\_cfm group and the Lab\_SS-vs-R\_bft group.
